# Supplementary material
Source: publisher figshare collection journal article supplement (https://adisjournals.figshare.com/articles/dataset/_/19950266)
Supplement: Supplementary file 1 [file 3]

**Real-world reductions in healthcare resource utilization over 6 months in patients with substance use disorders treated with a prescription digital therapeutic**

Neel Shah, BPharm, PhD<sup>1</sup>; Fulton F. Velez, MD, MS, MBA<sup>1</sup>; Samuel Colman, MS<sup>2</sup>; Laura Kauffman MS;<sup>2</sup> Charles Ruetsch, PhD;<sup>3</sup> Kathryn Anastassopoulos, MS<sup>2</sup>; Yuri Maricich, MD<sup>1</sup>

<sup>1</sup>Pear Therapeutics, Inc. (US) Boston, MA; <sup>2</sup>Market Access Consulting, Labcorp Drug Development, Gaithersburg, MD; <sup>3</sup>Health Analytics, Columbia, MD

**Corresponding Author:**

Neel Shah  
Pear Therapeutics  
E-mail: neel.shah@peartx.com

**Abstract** (278 words, limit: 300)

**Background and Aims:** Substance use disorders (SUDs) affect approximately 40.3 million people in the United States, yet only approximately 19% receive evidence-based treatment each year. reSET® is a prescription digital therapeutic (PDT) and the only FDA-authorized treatment for patients with cocaine, cannabis, and stimulant use disorders. This study evaluated real-world healthcare resource utilization (HCRU) and associated costs 6 months after initiation of reSET in patients with SUD.

**Methods:** A retrospective analysis of HealthVerity PrivateSource20 data compared the 6-month incidence of all-cause hospital facility encounters and clinician services in patients treated with reSET (re-SET cohort) before (pre-index period) and after (post-index period) reSET initiation (index). Incidence was compared using incidence rate ratios (IRR). HCRU-related costs were also assessed.

**Results:** The sample included 101 patients (median age 37 years, 50.5% female, 54.5% Medicaid-insured). A statistically significant decrease of 50% was observed in overall hospital encounters from pre-index to post-index (IRR: 0.50; 95% CI: 0.37-0.67;  $P<0.001$ ), which included: inpatient stays (56% decrease; IRR: 0.44; 95% CI: 0.26-0.76;  $P=0.003$ ), partial hospitalizations (57% decrease; IRR: 0.43; 95% CI: 0.21-0.88;  $P=0.021$ ), and emergency department visits (45% decrease; IRR: 0.55; 95% CI: 0.38-0.80;  $P<0.004$ ). Additionally, some clinician services declined significantly including pathology and laboratory services: other (54% decrease; IRR: 0.46; 95% CI: 0.28-0.76;  $P=0.003$ ); pathology and laboratory services: drug assays prior to opioid medication prescription (37% decrease; IRR: 0.63; 95% CI: 0.41-0.96;  $P=0.031$ ); alcohol and drug abuse: medication services (46% decrease; IRR: 0.54; 95% CI: 0.41-0.70;  $P<0.001$ ).

Reductions in facility-encounters drove 6-month reSET per-patient cost reductions of \$3,591 post-index compared to pre-index.

**Conclusions:** Use of reSET by patients with SUD is associated with durable reductions in HCRU and lower healthcare costs over 6 months compared to the 6 months before PDT treatment, after adjusting for covariates, providing an economic benefit to the healthcare system.

**Keywords:** community reinforcement approach; contingency management; healthcare resource utilization; digital therapeutic, DTx, prescription digital therapeutic; PDT; reSET; substance use disorders; SUD.

## Key Summary Points

Why carry out this study?

- Substance use disorders (SUDs) place a heavy cost burden on health care systems and society at large.
- Many barriers to effective treatment of SUDs may be overcome with prescription digital therapeutics (PDTs) delivering evidence-based, FDA-approved treatments to patients via mobile devices.
- This study evaluated the real-world 6-month impact on healthcare resource utilization (HCRU) in 101 patients with SUDs treated with the reSET<sup>®</sup> PDT.

What was learned from this study?

- Comparing the 6 months before treatment to the 6 months after treatment with the PDT, significant decreases were observed in overall hospital encounters, inpatient stays, partial hospitalizations, and emergency department visits.
- Reductions in facility-encounter HCRU drove 6-month per-patient cost reductions of \$3,591 post-treatment compared to pre-treatment.

## DIGITAL FEATURES

This article is published with digital features, including an infographic to facilitate understanding of the article. To view digital features for this article go to <https://doi.org/10.6084/m9.figshare.19950266>

## Introduction

Substance use disorders (SUDs) are highly heterogeneous conditions[1] affecting approximately 40.3 million people in the United States (US), and yet the most recently-available data show that only about 6.5% of these people ever receive SUD treatment[2]. These challenges have been exacerbated during the COVID-19 pandemic[2]. According to the Centers for Disease Control and Prevention, as of June 2020 13% of US adults reported starting or increasing substance use as a way of coping with stress or emotions related to COVID-19[3]. The pandemic has also added an additional layer of challenge for treatment service providers as many have had to quickly adopt an online format to continue operations. Furthermore, although behavioral and psychosocial treatments for SUD have long existed[4], most patients do not receive these therapies due to a lack of specialty facilities and/or trained clinicians or geographical barriers in rural communities[5-7].

A wider use of behavioral therapies is also impeded by inconsistent delivery, quality, and fidelity across healthcare providers[8], and high attrition rates among providers[9]. It has been suggested that virtual support programs can assist patients in recovery or reduce misuse, especially when access to physicians can be challenging[10-12]. Being forced into isolation, quarantines, curfews, and shutdowns have limited access to in-person supportive programs and have heightened the risk for increased alcohol consumption and drug use, especially among predisposed individuals[13, 14].

The many challenges posed by SUDs fall disproportionately on underserved populations such as older adults, racial/ethnic minorities, rural populations, military veterans, low-income individuals, and sexual and gender minorities[15]. SUDs also place a heavy cost burden on health care systems and society at large. A 2021 study found that the total annual SUD medical

cost in hospitals was \$13.2 billion with annual costs varying by substance type (e.g., \$4 million for inhalant-related disorders and \$7.6 billion for alcohol-related disorders)[16].

Goals of treatment for various SUDs include harm reduction and early intervention with cognitive behavioral therapy (CBT) and/or contingency management (CM)[17]. Harm reduction with CBT can significantly reduce use of substances and the impact of the complex problems associated with use[18, 19]. For example, reduced alcohol consumption is associated with physical and psychological benefits[20], and there is strong empirical support for early intervention (i.e., treatment of lower-severity AUD and those in earlier stages of addiction) using harm reduction strategies[18].

Studies have consistently demonstrated that CM can support engagement and abstinence in patients with SUDs, particularly those with use disorders related to cannabis, cocaine, and stimulants[21] with CM showing the highest individual effect size in a meta-analysis of techniques for treating SUDs[22].

Digital therapeutic approaches have the potential to deliver high-fidelity, evidence-based mechanisms of action, to reach broad patient populations across a variety of diseases, and to tailor treatment to patients' needs, stages of recovery, and clinical trajectories. They can be delivered in a patient-centric manner across diverse care settings and can address variables that constitute social determinants of health[23]. Prescription digital therapeutics (PDTs) are software-based disease treatments evaluated for safety and effectiveness in randomized controlled trials (RCTs) and authorized by the U.S. Food and Drug Administration (FDA). Prescribed by treating physicians, and delivered on mobile devices, PDTs can expand access to evidence-based behavioral therapies across a variety of diseases, including SUDs.

The reSET® PDT is a 12-week therapeutic combining CBT based on the Community Reinforcement Approach (CRA) [24], a CM system providing motivational incentives for lesson completion and abstinence, and fluency training to reinforce concept mastery[25]. It is the only FDA-authorized treatment for adult patients with cocaine, cannabis, and stimulant use disorders.

The clinical effectiveness of reSET was evaluated in a number of RCTs involving approximately 1500 patients with SUDs[26-32], and a real-world study in 602 patients[33]. These studies demonstrated improved rates of abstinence and treatment retention among patients receiving the digital therapy as an adjunct to reduced treatment-as-usual (TAU) compared to those who received treatment-as-usual (TAU) alone.

Real-world data acquired in the context of health care delivery and in the absence of stringent research constraints provides a complementary evaluation of therapeutic performance, including measures of patient engagement and clinical outcomes as well as HCRU and costs-of-care[34, 35]. To date, however, no data have yet been published about the impact of reSET use on HCRU and costs of care.

The objective of this study was to evaluate the real-world HCRU impact in an early cohort of commercially-insured patients treated with the reSET PDT.

## Methods

A 6-month observational retrospective analysis of HealthVerity PrivateSource20 closed-claims data (January 1, 2018 through February 28, 2021) was conducted in adults in the US diagnosed with SUD and prescribed reSET. Patients who filled their reSET prescription (index date) and engaged with the therapeutic for longer than 1 week were included in the reSET cohort (Figure 1). All patients were required to have at least 4 months of enrolment in the pre-index and post-index periods.

All patients had been deemed by their prescribing clinician as being appropriate for the PDT. The incidence of HCRU was compared between the 6-month pre-index period and the 6-month post-index period.

A scenario analysis of the cost impact of changes in facility and clinical service encounters was conducted using published facility costs for patients with OUD: \$19,023 for inpatient (IP) stays[36], \$124,419 for intensive care unit (ICU) stays(24), \$1,969 for emergency department (ED) visits)[16], and 2020 Medicare reimbursement rates for remaining facility and clinician services, as has been performed in previous analyses[37]. These costs were multiplied by the number of events in each category and averaged by patient to derive the net cost reductions/increases.

#### Data sources and statistical analyses

The PrivateSource20 data source includes closed medical claims for approximately 70 million commercial, 60 million Medicaid, and 15 million Medicare Advantage enrollees across 150 payers since 2015. All US census regions and states, Washington DC, and Puerto Rico are represented. The data include enrollment history and healthcare claims for both pharmacy and medical benefits from all settings of care. Medical claims include diagnoses and procedures for exact dates of service. Pharmacy claims include prescribed medications, prescription date, days' supply, and quantity dispensed.

The analysis will examine the differences in the incidence of HCRU encounters between the pre-index and post-index periods. The incidence for each HCRU encounter type will be calculated using a repeated measures (pre and post) negative binomial model. An incidence rate ratio (IRR) will be calculated as the incidence in the post-index period relative to the incidence in the pre-index period, and will be used to compare the pre-index and post-index incidence (e.g.,

an IRR < 1 indicates lower HCRU in the post-index period compared to the pre-index period). The 95% confidence intervals for the incidences and the IRR will also be calculated along with the IRR P-value. Analyses were performed using SAS statistical software (SAS Institute Inc. Cary, North Carolina, U.S.)

This study received a waiver of authorization for the use and disclosure of protected health information (PHI) and a determination of exempt status under 45 CFR § 46.104(d)(4) from Western Institutional Review Board on October 21, 2021.

#### PDT Description

The reSET CBT content consists of a series of interactive, on-demand audio, text, and video modules that are sequentially unlocked as patients progress through the program with CM providing motivational incentives for lesson completion and abstinence. Patients are instructed to complete 4 modules per week starting with the 31 core modules and then, when those are completed, an additional 30 supplemental modules.

Core modules teach basic cognitive behavioral and relapse prevention skills, and provide education about behavioral risk reduction for infections related to sex or shared needles. Supplemental modules target improved psychosocial functioning (e.g., managing relationships, building communication skills, and improving time management) and provide in-depth training on preventing or living with infections. Upon successful completion of each module the patient undergoes fluency training via a quiz and they have a chance to “spin” the digital CM wheel to be eligible for either virtual rewards (e.g., a “thumbs up” icon) or digital gift certificates ranging in value from \$5 to \$100, with the odds of winning a certificate higher for lower-value certificates. Patient-reported outcomes can be recorded in the PDT, and the clinical care team can



enter urine drug screen results, with negative results allowing providing the patient with another CM wheel spin.

### Study Measures

This study evaluated patient demographic characteristics including age, sex, geographic region, and payer type. Claims in the pre-index and post-index period were identified as facility claims or clinician service claims in order to characterize patients' HCRU. All-cause hospital facility encounters were evaluated overall and individually for IP stays, ED visits, partial hospitalizations (PH), and hospital outpatient department (HOPD) surgical visits. Among the inpatient stays, intensive care unit (ICU) stays were examined. Clinician services included categories of Current Procedure Terminology (CPT) codes identified from clinician claims such as evaluation and management (E&M), specific medical services (e.g., cardiovascular, psychiatry, neurology), pathology and laboratory, and rehabilitative services. Costs associated with facility encounters were evaluated.

### **Results**

The study included 101 patients who were prescribed and using reSET with a median age of 37 years, 50.5% female, 54.5% Medicaid-insured, and 37.6% commercially-insured (Table 1). Approximately 71.4% of patients had an alcohol-related disorder, 41.6% had a nicotine-related disorder, 38.% had an opioid-related disorder, 33.7% had a cannabis-related disorder, 29.7% had a cocaine-related disorder, and 10.9% had a disorder related to a stimulant other than cocaine. (Percentages don't add to 100% because patients often have multiple substance disorders).

Approximately one-quarter of patients (N=24) were prescribed naltrexone in either the pre-index or post-index periods.

A statistically significant decrease of 50% was observed in overall hospital facility encounters from the pre-index period (incidence=1.326) to the post-index period (incidence=0.661) (IRR: 0.50; 95% CI: 0.37-0.67;  $P<0.001$ ) (Table 2). Statistically significant decreases were observed for inpatient stays (56% decrease; IRR: 0.44; 95% CI: 0.26-0.76;  $P=0.003$ ), PHs (57% decrease; IRR: 0.43; 95% CI: 0.21-0.88;  $P=0.021$ ), and ED visits (not admitted) (45% decrease; IRR: 0.55; 95% CI: 0.38-0.80;  $P<0.002$ ). Decreases in HPOD surgical visits were not significant (50% decrease; IRR: 0.50; 95% CI: 0.12-2.04;  $P<0.335$ ).

Significant changes were observed in the use of a number of clinician services. The top 4 service categories with the largest changes, in terms of number of events in the observational periods included pathology and laboratory services: other (54% decrease; IRR: 0.46; 95% CI: 0.28-0.76;  $P=0.003$ ); pathology and laboratory services: drug assays prior to opioid medication prescription (37% decrease; IRR: 0.63; 95% CI: 0.41-0.96;  $P=0.031$ ); alcohol and drug abuse: medication services (46% decrease; IRR: 0.54; 95% CI: 0.41-0.70;  $P<0.001$ ); and alcohol and drug abuse: treatment program (11% decrease; IRR: 0.89; 95% CI: 0.61-1.30;  $P=0.552$ ) (see supplementary Table 1 for a complete listing of clinician and facility services data).

Reductions in hospital facility HCRU drove 6-month, per-patient net cost reductions of \$3,591 in the post-index period.

## Discussion

Acute healthcare utilization attributed to SUD is continuing to rise, particularly among patients with stimulant use disorder[38, 39], and in minority populations[2]. This is the first real-world evaluation to describe the economic and clinical effectiveness of the only SUD treatment

intervention currently FDA-authorized for patients with cocaine, cannabis, and stimulant use disorders. Expansion of the Affordable Care Act's SUD services to Medicaid recipients as well as to young adults between the ages of 18 and 23 may have resulted in an increase in treatments for these patients[40, 41], but the efficacy of these treatments and the net benefit has yet to be determined. No other treatment intervention for SUD to our knowledge has exhibited real-world effectiveness and net monetary benefit to the health system.

This study showed that within-patient hospital encounters dropped by 50%, and ED visits by 45% in the 6 month period after treatment with reSET compared to a similar baseline period. Patients with SUDs often seek care in the ED, and overuse of services in this setting unnecessarily burdens the health care system. The situation is complicated for patients with ED presentations related to cocaine and psychostimulants because such visits may not be identified as related to drug toxicity/withdrawal and, instead, be described by the interventions used, such as acute cardiopulmonary services or psychiatric interventions[38].

The reductions in service usage we observed are particularly significant in the context of reported increases in service usage during the COVID-19 pandemic among patients with SUDs. Although hospitalization rates for certain disease states declined during the pandemic (e.g., acute cardiovascular disease,[42] and stroke/TIAs[43]), several published datasets and analyses show that among patients with existing SUDs the rate of ED visits and hospitalizations increased during the pandemic. This may partially be due to an increased susceptibility to COVID among people with SUDs. For example, a 2022 study found that people with SUDs or alcohol use disorders have a greater probability of being hospitalized for COVID-19 infections compared to the general population.[44] Regardless of the cause, however, a 2021 report by Holland et al., in *JAMA Psychiatry* found that, compared to pre-pandemic rates in 2019, rates of ED visits related to all-drug overdoses rose from 12,891 to 14,959 per 100,000 ED visits, and the rates of visits related to opioid-related overdoses rose from 3940 to 5075 per 100,000 ED visits.[45]

We were unable to perform subgroup analyses by gender, race, and insurance status due to small sample sizes. Evidence in the literature clearly reveals a significant unmet need for SUD treatments among racial minorities, reproductive age women, and veterans, all of whom are

disproportionately vulnerable to SUD and its deleterious effects[46-48]. Future investigations should focus on these populations.

### Limitations

Potential limitations exist that are common with all healthcare claims-based analyses. For instance, mortality cannot be assessed using claims data and it is possible that some patients may have died in the post-index period. Another limitation of claims data is the potential for data entry errors, as well as the absence of medical history context (which can affect the interpretability of the observed trends). Cost calculations are limited to estimates derived from the published literature, therefore they may not be representative of actual costs, which will vary across different healthcare plans. A limitation of a pre/post design is that the potential impact of secular trends is limited by the period (e.g., 6 months) over which incidence is assessed and compared pre/post. It is important to note that observational research complements the evidence from randomized controlled trials on which FDA authorization decisions are made because real-world, post-authorization studies provide evidence from all-comer populations being treated in a wide range of locations and settings, which is much different from the selected populations being treated in highly controlled environments typical of clinical trials.

### **Conclusions**

This real-world evaluation in diverse patients with SUD treated with the reSET PDT showed significant decreases in unique hospital encounters and ED visits 6 months after initiation of the PDT compared to the 6 months before treatment. The observed per-patient cost reduction of \$3,591 in the pre-post analysis suggests that treating patients with reSET may lower overall costs of care, which may be relevant to payors at all levels of the healthcare system.

286

287

288

289

290 **Acknowledgements**

291 The authors thank Stephen Braun and Rowan Mahon for editorial assistance in the preparation of  
292 this manuscript.

293

294 **Funding**

295 This study and journal's Rapid Service Fee were funded entirely by Pear Therapeutics (US), Inc.

296

297 **Authorship**

298 All named authors meet the International Committee of Medical Journal Editors (ICMJE) criteria  
299 for authorship for this article, take responsibility for the integrity of the work as a whole, and  
300 have given their approval for this version to be published.

301

302 **Author contributions**

303 All authors contributed to the study conception and design. Material preparation, data  
304 collection, and analysis were performed by Samuel Colman, Laura Kauffman, Charles Ruetsch,  
305 and Kathryn Anastassopoulos. The first draft of the manuscript was written by Neel Shah, and all  
306 authors commented on subsequent versions of the manuscript. All authors read and approved the  
307 final manuscript.

308 **Disclosures**

309 Neel Shah, Fulton Velez, and Yuri Maricich are employees of Pear Therapeutics (US), Inc.  
310 Samuel Colman, Laura Kauffman, and Kathryn Anastassopoulos are employees Market Access  
311 Consulting, Labcorp Drug Development, which participated in this study under contract with  
312 Pear Therapeutics (US), Inc. Charles Ruetsch is an employee of Health Analytics, which  
313 participated in this study under contract with Pear Therapeutics (US), Inc.

314

315 **Compliance with Ethics Guidelines**

316 This study received a waiver of authorization for the use and disclosure of protected health  
317 information (PHI) and a determination of exempt status under 45 CFR § 46.104(d)(4) from  
318 Western Institutional Review Board on October 21, 2021.

319

320

321 **Figure and Table Titles**

322

323 **Figure 1. CONSORT diagram for reSET 6-month pre/post analyses**

324

325

326

Pre-typeset proofs

**Table 1. Patient demographics and characteristics**

| Demographic/characteristic      | reSET cohort<br>(N = 101) |
|---------------------------------|---------------------------|
| Median age                      | 37                        |
| Female sex                      | 50.5%                     |
| Mean Charlson comorbidity score | 0.802                     |
| Payer, n (%)                    |                           |
| Commercial                      | 38 (37.6%)                |
| Medicaid                        | 55 (54.5%)                |
| Medicare Advantage              | 3 (3.0%)                  |
| Unknown                         | 5 (5.0%)                  |
| Census region, n (%)            |                           |
| Middle Atlantic                 | 41 (40.6%)                |
| East North Central              | 17 (16.8%)                |
| South Atlantic                  | 12 (11.9%)                |
| Other                           | 31 (30.7%)                |

**Table 2. reSET cohort pre/post analysis of incidence of hospital facility services over 6 months**

| Resource                                                                                                                               | Pre-index period<br>(N=101) |           |                | Post-index period<br>(N=101) |           |                | IRR  | 95% CI       | p-value |
|----------------------------------------------------------------------------------------------------------------------------------------|-----------------------------|-----------|----------------|------------------------------|-----------|----------------|------|--------------|---------|
|                                                                                                                                        | n (%)                       | Incidence | 95% CI         | n (%)                        | Incidence | 95% CI         |      |              |         |
| 6-month                                                                                                                                |                             |           |                |                              |           |                |      |              |         |
| Unique hospital encounters                                                                                                             | 46 (45.5%)                  | 1.326     | (0.974, 1.805) | 31 (30.7%)                   | 0.661     | (0.456, 0.959) | 0.50 | (0.37, 0.67) | <0.001  |
| Inpatient stays                                                                                                                        | 22 (21.8%)                  | 0.320     | (0.209, 0.488) | 12 (11.9%)                   | 0.142     | (0.081, 0.248) | 0.44 | (0.26, 0.76) | 0.003   |
| ICU stays                                                                                                                              | 0 (0.0%)                    | 0.000     | (0.000, 0.030) | 2 ( 2.0%)                    | 0.020     | (0.005, 0.081) | NA   | NA           | NA      |
| Readmissions                                                                                                                           | 6 ( 5.9%)                   | 0.080     | (0.035, 0.182) | 1 ( 1.0%)                    | 0.010     | (0.001, 0.071) | 0.13 | (0.02, 1.07) | 0.058   |
| Partial hospitalizations                                                                                                               | 9 ( 8.9%)                   | 0.278     | (0.130, 0.595) | 6 ( 5.9%)                    | 0.120     | (0.053, 0.269) | 0.43 | (0.21, 0.88) | 0.021   |
| ED visits - not admitted                                                                                                               | 35 (34.7%)                  | 0.710     | (0.497, 1.013) | 22 (21.8%)                   | 0.391     | (0.244, 0.627) | 0.55 | (0.38, 0.80) | 0.002   |
| HOPD visits                                                                                                                            | 2 ( 2.0%)                   | 0.020     | (0.005, 0.079) | 1 ( 1.0%)                    | 0.010     | (0.001, 0.072) | 0.50 | (0.12, 2.04) | 0.335   |
| CI, confidence interval; ED, emergency department; HOPD, hospital outpatient department; IRR, incidence rate ratio; NA, not applicable |                             |           |                |                              |           |                |      |              |         |
| n=number of patients with at least 1 encounter                                                                                         |                             |           |                |                              |           |                |      |              |         |

## References

1. Carroll KM. The profound heterogeneity of substance use disorders: implications for treatment development. *Curr Dir in Psychol Sci.* 2021;30(4):358-64.
2. Substance Abuse and Mental Health Services Administration. Key substance use and mental health indicators in the United States: Results from the 2020 National Survey on Drug Use and Health (HHS Publication No. PEP21-07-01-003, NSDUH Series H-56) 2020 [Available from: <https://www.samhsa.gov/data/>].
3. Centers for Disease Control & Prevention. Mental Health, Substance Use, and Suicidal Ideation During the COVID-19 Pandemic [Available from: <https://www.cdc.gov/mmwr/volumes/69/wr/mm6932a1.htm>].
4. Miller SC, Fiellin DA, Rosenthal RN, Saitz R. *The ASAM Principles of Addiction Medicine*. 6th ed: Wolters Kluwer; 2018.
5. Moore BA, Fazzino T, Garnet B, Cutter CJ, Barry DT. Computer-based interventions for drug use disorders: a systematic review. *J Subst Abuse Treat.* 2011;40(3):215-23.
6. Kiluk BD, Sugarman DE, Nich C, Gibbons CJ, Martino S, Rounsaville BJ, et al. A methodological analysis of randomized clinical trials of computer-assisted therapies for psychiatric disorders: toward improved standards for an emerging field. *Am J Psychiatry.* 2011;168(8):790-9.
7. Marsch LA, Carroll KM, Kiluk BD. Technology-based interventions for the treatment and recovery management of substance use disorders: a JSAT special issue. *J Subst Abuse Treat.* 2014;46(1):1-4.
8. Institute of Medicine. *Improving the Quality of Health Care for Mental and Substance-Use Conditions*. Washington, DC: The National Academies Press; 2006. 528 p.
9. Lappan SN, Brown AW, Hendricks PS. Dropout rates of in-person psychosocial substance use disorder treatments: a systematic review and meta-analysis. *Addiction.* 2020;115(2):201-17.
10. Bergman BG, Kelly JF, Fava M, Eden Evins A. Online recovery support meetings can help mitigate the public health consequences of COVID-19 for individuals with substance use disorder. *Addict Behav.* 2021;113:106661.



- 367 11. Spagnolo PA, Montemitro C, Leggio L. New Challenges in Addiction Medicine:  
368 COVID-19 Infection in Patients With Alcohol and Substance Use Disorders-The Perfect Storm.  
369 Am J Psychiatry. 2020;177(9):805-7.
- 370 12. Molfenter T, Heitkamp T, Murphy AA, Tapscott S, Behlman S, Cody OJ. Use of  
371 Telehealth in Mental Health (MH) Services During and After COVID-19. Community Ment  
372 Health J. 2021;57(7):1244-51.
- 373 13. Marsden J, Darke S, Hall W, Hickman M, Holmes J, Humphreys K, et al. Mitigating and  
374 learning from the impact of COVID-19 infection on addictive disorders. Addiction.  
375 2020;115(6):1007-10.
- 376 14. Horigian VE, Schmidt RD, Feaster DJ. Loneliness, Mental Health, and Substance Use  
377 among US Young Adults during COVID-19. J Psychoactive Drugs. 2021;53(1):1-9.
- 378 15. National Academies of Sciences Engineering and Medicine. Communities in Action:  
379 Pathways to Health Equity: National Academies Press; 2017 [Available from:  
380 <https://www.nap.edu/catalog/24624/communities-in-action-pathways-to-health-equity>.
- 381 16. Peterson C, Li M, Xu L, Mikosz CA, Luo F. Assessment of Annual Cost of Substance  
382 Use Disorder in US Hospitals. JAMA Netw Open. 2021;4(3):e210242.
- 383 17. Paquette CE, Daughters SB, Witkiewitz K. Expanding the continuum of substance use  
384 disorder treatment: Nonabstinence approaches. Clin Psychol Rev. 2022;91:102110.
- 385 18. Charlet K, Heinz A. Harm reduction-a systematic review on effects of alcohol reduction  
386 on physical and mental symptoms. Addict Biol. 2017;22(5):1119-59.
- 387 19. Marlatt GA, Witkiewitz K. Harm reduction approaches to alcohol use: health promotion,  
388 prevention, and treatment. Addict Behav. 2002;27(6):867-86.
- 389 20. Witkiewitz K, Kranzler HR, Hallgren KA, Hasin DS, Aldridge AP, Zarkin GA, et al.  
390 Stability of Drinking Reductions and Long-term Functioning Among Patients with Alcohol Use  
391 Disorder. J Gen Intern Med. 2021;36(2):404-12.
- 392 21. Benishek LA, Dugosh KL, Kirby KC, Matejkowski J, Clements NT, Seymour BL, et al.  
393 Prize-based contingency management for the treatment of substance abusers: a meta-analysis.  
394 Addiction. 2014;109(9):1426-36.
- 395 22. Prendergast M, Podus D, Finney J, Greenwell L, Roll J. Contingency management for  
396 treatment of substance use disorders: a meta-analysis. Addiction. 2006;101(11):1546-60.

397 23. Lord SE, Campbell ANC, Brunette MF, Cubillos L, Bartels SM, Torrey WC, et al.  
398 Workshop on Implementation Science and Digital Therapeutics for Behavioral Health. *JMIR*  
399 *Ment Health*. 2021;8(1):e17662.

400 24. Budney AJ, Higgins ST. Therapy manuals for drug addiction, a community  
401 reinforcement plus vouchers approach: treating cocaine addiction. Rockville, MD: National  
402 Institute on Drug Abuse; 1998.

403 25. Petry NM, Alessi SM, Olmstead TA, Rash CJ, Zajac K. Contingency management  
404 treatment for substance use disorders: How far has it come, and where does it need to go?  
405 *Psychol Addict Behav*. 2017;31(8):897-906.

406 26. Bickel WK, Marsch LA, Buchhalter AR, Badger GJ. Computerized behavior therapy for  
407 opioid-dependent outpatients: a randomized controlled trial. *Exp Clin Psychopharmacol*.  
408 2008;16(2):132-43.

409 27. Marsch LA, Guarino H, Acosta M, Aponte-Melendez Y, Cleland C, Grabinski M, et al.  
410 Web-based behavioral treatment for substance use disorders as a partial replacement of standard  
411 methadone maintenance treatment. *J Subst Abuse Treat*. 2014;46(1):43-51.

412 28. Christensen DR, Landes RD, Jackson L, Marsch LA, Mancino MJ, Chopra MP, et al.  
413 Adding an internet-delivered treatment to an efficacious treatment package for opioid  
414 dependence. *J Consult Clin Psychol*. 2014;82(6):964-72.

415 29. Campbell AN, Nunes EV, Matthews AG, et al. Internet-delivered treatment for substance  
416 abuse: a multisite randomized controlled trial. *Am J Psychiatry*. 2014;171(6):683-90.

417 30. Chaple M, Sacks S, McKendrick K, Marsch LA, Belenko S, Leukefeld C, et al. A  
418 Comparative Study of the Therapeutic Education System for Incarcerated Substance-Abusing  
419 Offenders. *The Prison Journal*. 2016;96(3):485-508.

420 31. Luderer HF, Campbell ANC, Nunes EV, Enman NM, Xiong X, Gerwien R, et al.  
421 Engagement patterns with a digital therapeutic for substance use disorders: Correlations with  
422 abstinence outcomes. *J Subst Abuse Treat*. 2022;132:108585.

423 32. Maricich Y, Nunes EV, Campbell ANC, et al. Safety and Efficacy of a Digital  
424 Therapeutic for Substance Use Disorder: Secondary Analysis of Data From a NIDA Clinical  
425 Trials Network Study. *Substance Abuse*. 43(1):937-42.

33. Xiong X, Braun S, Stitzer M, Luderer H, Shafai G, Hare B, et al. Evaluation of real-world outcomes associated with use of a prescription digital therapeutic to treat substance use disorders. *Am J Addict*. 2022; Accepted for publication March 9, 2022.
34. Dreyer NA. Advancing a Framework for Regulatory Use of Real-World Evidence: When Real Is Reliable. *Ther Innov Regul Sci*. 2018;52(3):362-8.
35. Blonde L, Khunti K, Harris SB, Meizinger C, Skolnik NS. Interpretation and Impact of Real-World Clinical Data for the Practicing Clinician. *Adv Ther*. 2018;35(11):1763-74.
36. Arifkhanova A, McCormick Kraus E, Al-Tayyib A, Taub J, Encinias A, McEwen D, et al. Estimating costs of hospitalizations associated with opioid use disorder or opioid misuse at a large, urban safety-net hospital-Denver, Colorado, 2017. *Drug Alcohol Depend*. 2021;218:108306.
37. Centers for Medicare and Medicaid Services (CMS). Medicare Hospital Outpatient Prospective Payment System Addendum A, April 2020 file. 2020 [Available from: <https://www.cms.gov/Medicare/Medicare-Fee-For-Service-Payment/HospitalOutpatientPPS/Addendum-A-and-Addendum-B-Updates>].
38. Suen LW, Davy-Mendez T, LeSaint KT, Riley ED, Coffin PO. Emergency department visits and trends related to cocaine, psychostimulants, and opioids in the United States, 2008-2018. *BMC Emerg Med*. 2022;22(1):19.
39. Jones CM, Houry D, Han B, Baldwin G, Vivolo-Kantor A, Compton WM. Methamphetamine use in the United States: epidemiological update and implications for prevention, treatment, and harm reduction. *Ann N Y Acad Sci*. 2022;1508(1):3-22.
40. Maclean JC, Saloner B. The Effect of Public Insurance Expansions on Substance Use Disorder Treatment: Evidence from the Affordable Care Act. *J Policy Anal Manage*. 2019;38(2):366-93.
41. Saloner B, Akosa Antwi Y, Maclean JC, Cook B. Access to Health Insurance and Utilization of Substance Use Disorder Treatment: Evidence from the Affordable Care Act Dependent Coverage Provision. *Health Econ*. 2018;27(1):50-75.
42. Kiss P, Carcel C, Hockham C, Peters SAE. The impact of the COVID-19 pandemic on the care and management of patients with acute cardiovascular disease: a systematic review. *Eur Heart J Qual Care Clin Outcomes*. 2021;7(1):18-27.

- 456 43. Mariet AS, Giroud M, Benzenine E, Cottenet J, Roussot A, Aho-Glele LS, et al.  
457 Hospitalizations for Stroke in France During the COVID-19 Pandemic Before, During, and After  
458 the National Lockdown. *Stroke*. 2021;52(4):1362-9.
- 459 44. Pavarin RM, Fabbri C, De Ronchi D. COVID-19 hospitalization rates in individuals with  
460 substance or alcohol use disorders. *Psychiatry Res*. 2022;311:114521.
- 461 45. Holland KM, Jones C, Vivolo-Kantor AM, Idaikkadar N, Zwald M, Hoots B, et al.  
462 Trends in US Emergency Department Visits for Mental Health, Overdose, and Violence  
463 Outcomes Before and During the COVID-19 Pandemic. *JAMA Psychiatry*. 2021;78(4):372-9.
- 464 46. Mulvaney-Day N, DeAngelo D, Chen CN, Cook BL, Alegria M. Unmet need for  
465 treatment for substance use disorders across race and ethnicity. *Drug Alcohol Depend*. 2012;125  
466 Suppl 1:S44-50.
- 467 47. Martin CE, Scialli A, Terplan M. Unmet substance use disorder treatment need among  
468 reproductive age women. *Drug Alcohol Depend*. 2020;206:107679.
- 469 48. Golub A, Vazan P, Bennett AS, Liberty HJ. Unmet need for treatment of substance use  
470 disorders and serious psychological distress among veterans: a nationwide analysis using the  
471 NSDUH. *Mil Med*. 2013;178(1):107-14.
- 472
