# Supplementary material
Source: publisher figshare collection journal article supplement (https://adisjournals.figshare.com/articles/dataset/_/19950266)
Supplement: Supplementary file 2 [file 3]

# **Real-world reductions in healthcare resource utilization over 6 months in patients with substance use disorders treated with a prescription digital therapeutic**

Neel Shah, BPharm, PhD<sup>1</sup>; Fulton F. Velez, MD, MS, MBA<sup>1</sup>; Samuel Colman, MS<sup>2</sup>; Laura Kauffman MS;<sup>2</sup> Charles Ruetsch, PhD;<sup>3</sup> Kathryn Anastassopoulos, MS<sup>2</sup>; Yuri Maricich, MD<sup>1</sup>

<sup>1</sup>Pear Therapeutics, Inc. (US) Boston, MA; <sup>2</sup>Market Access Consulting, Labcorp Drug Development, Gaithersburg, MD; <sup>3</sup>Health Analytics, Columbia, MD

## **Corresponding Author:**

Neel Shah  
Pear Therapeutics  
E-mail: neel.shah@peartx.com

Supplementary Table 1. Clinician services in the 6 months before and after reSET initiation (N=101)

| Resource                                                     | Pre-index period<br>(N=101) |                        |                 | Post-index period<br>(N=101) |                        |                 | IRR <sup>b</sup> | 95% CI       | p-value |
|--------------------------------------------------------------|-----------------------------|------------------------|-----------------|------------------------------|------------------------|-----------------|------------------|--------------|---------|
|                                                              | n (%)                       | Incidence <sup>a</sup> | 95% CI          | n (%)                        | Incidence <sup>a</sup> | 95% CI          |                  |              |         |
| Alcohol & drug abuse: Community support services             | 5 ( 5.0%)                   | 3.007                  | (0.835, 10.831) | 5 ( 5.0%)                    | 2.578                  | (0.629, 10.560) | 0.86             | (0.65, 1.13) | 0.275   |
| Alcohol & drug abuse: Mental health, partial hospitalization | 6 ( 5.9%)                   | 0.317                  | (0.128, 0.787)  | 4 ( 4.0%)                    | 0.307                  | (0.110, 0.858)  | 0.97             | (0.67, 1.41) | 0.871   |

|                                                                              |            |        |                 |            |        |                 |       |               |        |
|------------------------------------------------------------------------------|------------|--------|-----------------|------------|--------|-----------------|-------|---------------|--------|
| Alcohol & drug abuse: medication services                                    | 4 ( 4.0%)  | 2.069  | (0.443, 9.655)  | 5 ( 5.0%)  | 1.107  | (0.283, 4.327)  | 0.54  | (0.41, 0.70)  | <0.001 |
| Alcohol & drug abuse: Mental health, partial hospitalization                 | 6 ( 5.9%)  | 0.317  | (0.128, 0.787)  | 4 ( 4.0%)  | 0.307  | (0.110, 0.858)  | 0.97  | (0.67, 1.41)  | 0.871  |
| Alcohol & drug abuse: Other                                                  | 2 ( 2.0%)  | 0.109  | (0.024, 0.494)  | 5 ( 5.0%)  | 0.735  | (0.282, 1.915)  | 6.74  | (1.57, 28.88) | 0.010  |
| Alcohol & drug abuse: Psychosocial services                                  | 5 ( 5.0%)  | 1.191  | (0.420, 3.380)  | 1 ( 1.0%)  | 0.634  | (0.090, 4.457)  | 0.53  | (0.15, 1.92)  | 0.335  |
| Alcohol & drug abuse: Treatment program                                      | 20 (19.8%) | 6.206  | (3.695, 10.423) | 18 (17.8%) | 5.529  | (3.307, 9.245)  | 0.89  | (0.61, 1.30)  | 0.552  |
| Ambulance                                                                    | 16 (15.8%) | 0.349  | (0.182, 0.671)  | 13 (12.9%) | 0.706  | (0.173, 2.879)  | 2.02  | (0.76, 5.41)  | 0.161  |
| Drugs administered: Other                                                    | 38 (37.6%) | 0.810  | (0.561, 1.169)  | 27 (26.7%) | 0.770  | (0.464, 1.277)  | 0.95  | (0.63, 1.43)  | 0.808  |
| E&M: Care plan oversight                                                     | 1 ( 1.0%)  | 0.010  | (0.001, 0.071)  | 3 ( 3.0%)  | 0.133  | (0.041, 0.433)  | 13.42 | (3.42, 52.67) | <0.001 |
| E&M: Case management                                                         | 7 ( 6.9%)  | 0.271  | (0.069, 1.070)  | 6 ( 5.9%)  | 0.199  | (0.084, 0.473)  | 0.74  | (0.16, 3.48)  | 0.698  |
| E&M: Consultations                                                           | 12 (11.9%) | 0.229  | (0.129, 0.407)  | 2 ( 2.0%)  | 0.020  | (0.005, 0.080)  | 0.09  | (0.02, 0.36)  | <0.001 |
| E&M: Electronic medication compliance management                             | 0 (0.0%)   | 0.000c | (0.000, 0.030)c | 20 (19.8%) | 0.213c | (0.139, 0.327)c | NA    | NA            | NA     |
| E&M: Emergency department services                                           | 36 (35.6%) | 0.782  | (0.551, 1.111)  | 24 (23.8%) | 0.411  | (0.265, 0.638)  | 0.53  | (0.36, 0.76)  | <0.001 |
| E&M: Hospital inpatient services                                             | 16 (15.8%) | 1.093  | (0.614, 1.944)  | 12 (11.9%) | 0.746  | (0.291, 1.910)  | 0.68  | (0.24, 1.97)  | 0.480  |
| E&M: Outpatient visits                                                       | 84 (83.2%) | 6.029  | (4.815, 7.548)  | 78 (77.2%) | 5.511  | (4.316, 7.038)  | 0.91  | (0.76, 1.10)  | 0.349  |
| E&M: Partial hospitalization services                                        | 2 ( 2.0%)  | 0.321  | (0.227, 0.454)  | 0 (0.0%)   | 0.000  | (0.000, 0.030)  | NA    | NA            | NA     |
| E&M: Preventive medicine services                                            | 22 (21.8%) | 0.271  | (0.180, 0.408)  | 14 (13.9%) | 0.172  | (0.103, 0.289)  | 0.64  | (0.34, 1.17)  | 0.148  |
| E&M: Psychiatric services, intensive                                         | 4 ( 4.0%)  | 0.246  | (0.082, 0.745)  | 1 ( 1.0%)  | 0.010  | (0.001, 0.071)  | 0.04  | (0.00, 0.39)  | 0.006  |
| Medicine: Cardiovascular procedures                                          | 29 (28.7%) | 0.646  | (0.419, 0.994)  | 11 (10.9%) | 0.182  | (0.098, 0.340)  | 0.28  | (0.14, 0.55)  | <0.001 |
| Medicine: Home health services                                               | 2 ( 2.0%)  | 1.812  | (0.260, 12.609) | 1 ( 1.0%)  | 1.812  | (0.258, 12.745) | 1.00  | (0.98, 1.02)  | 0.999  |
| Medicine: Immunization                                                       | 14 (13.9%) | 0.150  | (0.091, 0.248)  | 6 ( 5.9%)  | 0.071  | (0.031, 0.161)  | 0.47  | (0.19, 1.19)  | 0.111  |
| Medicine: Immunology                                                         | 1 ( 1.0%)  | 0.020  | (0.005, 0.080)  | 0 (0.0%)   | 0.000  | (0.000, 0.030)  | NA    | NA            | NA     |
| Medicine: Ophthalmology                                                      | 16 (15.8%) | 0.191  | (0.119, 0.308)  | 7 ( 6.9%)  | 0.091  | (0.043, 0.195)  | 0.48  | (0.20, 1.16)  | 0.104  |
| Medicine: Other                                                              | 21 (20.8%) | 0.344  | (0.211, 0.561)  | 16 (15.8%) | 0.211  | (0.118, 0.377)  | 0.62  | (0.30, 1.27)  | 0.189  |
| Medicine: Physical medicine and rehabilitation                               | 9 ( 8.9%)  | 0.248  | (0.124, 0.498)  | 7 ( 6.9%)  | 0.239  | (0.086, 0.663)  | 0.96  | (0.39, 2.38)  | 0.933  |
| Medicine: Psychiatry                                                         | 59 (58.4%) | 8.456  | (5.865, 12.192) | 61 (60.4%) | 8.147  | (5.806, 11.432) | 0.96  | (0.75, 1.24)  | 0.775  |
| Medicine: Therapeutic, prophylactic, and diagnostic injections and infusions | 27 (26.7%) | 0.601  | (0.386, 0.937)  | 17 (16.8%) | 0.320  | (0.189, 0.542)  | 0.53  | (0.35, 0.81)  | 0.003  |
| Pathology and laboratory: Drug assay                                         | 53 (52.5%) | 3.478  | (2.409, 5.021)  | 41 (40.6%) | 3.367  | (2.272, 4.990)  | 0.97  | (0.64, 1.45)  | 0.876  |
| Pathology and laboratory: Drug assay, before opioid Rx                       | 55 (54.5%) | 4.725  | (3.183, 7.016)  | 44 (43.6%) | 2.965  | (2.009, 4.375)  | 0.63  | (0.41, 0.96)  | 0.031  |
| Pathology and laboratory: Other                                              | 70 (69.3%) | 3.338  | (2.215, 5.029)  | 61 (60.4%) | 1.538  | (1.091, 2.168)  | 0.46  | (0.28, 0.76)  | 0.003  |
| Radiology                                                                    | 46 (45.5%) | 1.100  | (0.772, 1.567)  | 30 (29.7%) | 0.531  | (0.345, 0.819)  | 0.48  | (0.31, 0.76)  | 0.002  |
| Surgery                                                                      | 57 (56.4%) | 1.677  | (1.133, 2.484)  | 46 (45.5%) | 1.067  | (0.683, 1.667)  | 0.64  | (0.39, 1.04)  | 0.069  |
